# Supplementary material
Source: PubMed Central journal article supplement (PMC7314454)
Supplement: mmc1.pdf [file mmc1.pdf]

# THE LANCET

## Digital Health

### Supplementary appendix 1

This appendix formed part of the original submission. We post it as supplied by the authors.

Supplement to: Chidambaram S, Erridge S, Kinross J, Purkayastha S, on behalf of the PanSurg Collaborative. Observational study of UK mobile health apps for COVID-19. *Lancet Digital Health* 2020; published online June 24. [https://doi.org/10.1016/S2589-7500\(20\)30144-8](https://doi.org/10.1016/S2589-7500(20)30144-8).

**PanSurg Collaborative:**

Ravi Aggarwal, Rabiya Aseem, Piers Boshier, Paris Bratsos, Swathikan Chidambaram, Emily Deurloo, Simon Dryden, Simon Erridge, Maxwell Flitton, Ayush Kulshreshtha, Max Denning, Emily Deurloo, Ola Markiewicz, Osama Moussa, Liam Poynter, Simon Rabinowicz, Ovidiu Serban, Alasdair Scott, Viknesh Sounderajah, Uddhav Vaghela, Leigh Warren, Jasmine Winter-Beatty, Seema Yalamanchili

**Contributors**

SP conceived the idea for the study. SC, SP and SE designed the study. SC and SE performed the search, screening and data extraction. SC, SE and SP analysed and interpreted the data. SC, SE, SP and JK drafted the manuscript. SP is study guarantor. All authors reviewed the final manuscript and agreed to be accountable for all aspects of the work and approved the final manuscript for submission. The corresponding author attests that all listed authors meet authorship criteria and that no others meeting the criteria have been omitted.

**Acknowledgements**

There are no acknowledgements

**Funding**

There are no funding sources to disclose.

**Ethical approval**

Not required.

**Data sharing**

Not applicable.

**Patient and public involvement**

This research was done without patient involvement. Patients were not invited to comment on the study design and were not consulted to develop patient relevant outcomes or interpret the results. Patients were not invited to contribute to the writing or editing of this document for readability or accuracy. There are no plans to disseminate the study results to patients or the public.
